# Supplementary material for: Controllable synthesis of nucleotide complex based on pH control: a small-molecule fluorescent probe as an auxiliary ligand to indicate the pre-organization of the nucleotide complex in solution
Source: Royal Society of Chemistry journal article supplement (doi:10.1039/c5dt02624e), 2015-01-01
Supplement: c5dt02624e1.pdf [file c5dt02624e1.pdf]

## Supporting Information

# Coordination-based pH-Responsive Metal-Nucleotide System: pH-Responsive Fluorescence Switch and SHG Crystalline Material

Pei Zhou, Chong Wang, Qi-ming Qiu, Jian-feng Yao, Chuan-Fang Sheng, and Hui Li\*

Key Laboratory of Clusters Science of Ministry of Education, School of Chemistry,  
Beijing Institute of Technology, Beijing, 100081, P. R. China.

\*E-mail address: [lihui@bit.edu.cn](mailto:lihui@bit.edu.cn)

Tel: 86-10-68912667

## Contents

|           |                                                     |        |
|-----------|-----------------------------------------------------|--------|
| Section 1 | Acidity Constants for 5'-Nucleoside Monophosphates. | p. S3  |
| Section 2 | UV-vis and Fluorescence Titration Spectra.          | p.S12  |
| Section 3 | Crystallography date and Structural Information.    | p. S3  |
| Section 4 | XRPD Patterns and IR spectra for <b>1-4</b> .       | p. S10 |
| Section 5 | Liquid-State CD Spectra of <b>1, 2</b> and CMP.     | p. S15 |
| Section 6 | Solid-State UV-vis Spectra.                         | p. S15 |
| Section 7 | TGA (Thermogravimetric Analysis).                   | p. S16 |
| Section 8 | Crystal-to-crystal transformation.                  | p. S16 |

## Section 1 Acidity Constants for 5'-Nucleoside Monophosphates.

Table S1. Acidity Constants for 5'-Nucleoside Monophosphates. (pKa. near 25 °C and 0.1 M ionic strength)

| 5'-NMP | N1                    | N7  | N9 | N3  |
|--------|-----------------------|-----|----|-----|
| AMP    | ~1.1 or $0.2 \pm 0.5$ | 3.8 |    |     |
| GMP    | 9.5                   | 2.4 |    |     |
| IMP    | 8.9                   | 1.3 |    |     |
| CMP    |                       |     | -  | 4.4 |
| UMP    |                       |     | -  | 9.6 |
| TMP    |                       |     | -  | 9.9 |

## Section 2. UV-vis and Fluorescence Titration Spectra

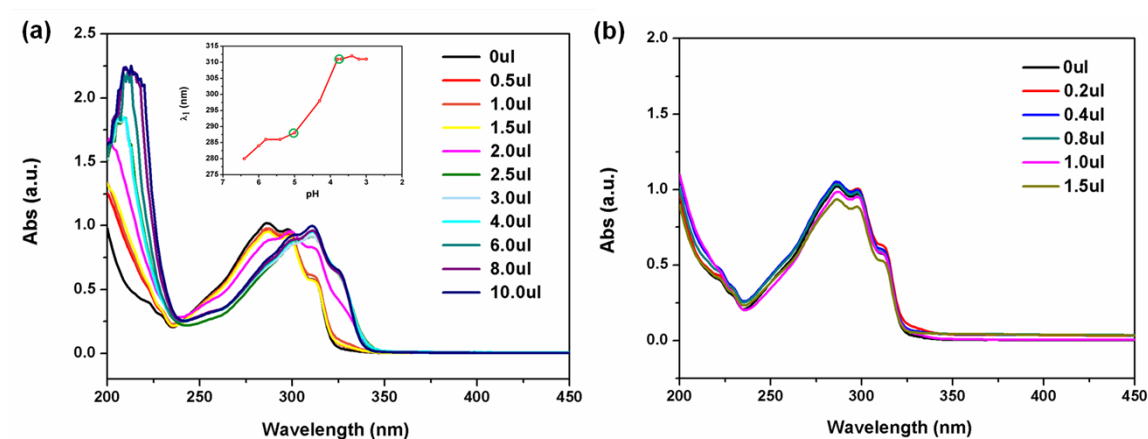

**Figure S1.** UV-visible absorption spectra recorded during titration of a solution of CMP-bpe-Mn(II) ( $[CMP]=[bpe]=[Mn^{2+}]=5 \times 10^{-5} \text{ mol/L}^{-1}$ ) with  $\text{HNO}_3$  (0.8M, *a*) or  $\text{NaOH}$  (1M, *b*). (*insert*) The changes of  $\lambda_1$  (wavelength of the highest energy absorption peak) at different pH value for the solution of complex **1** by addition of  $\text{HNO}_3$ .  $\lambda_1$  shows obvious red shift and a new absorption peak near 325nm appears at  $\text{pH} < 5$ , stating that there is a new species.

**Table S2.** The relationship between pH value and the acid/alkali addition in the solution of (a) bpe-Mn and (b) bpe-CMP ( $[\text{bpe-Mn}] = [\text{bpe-CMP}] = 5 \times 10^{-5} \text{ mol/L}$ ).

| <b>(a)</b>                       |      |      |      |      |      |      |      |      |      |      |      |      |      |      |      |      |     |
|----------------------------------|------|------|------|------|------|------|------|------|------|------|------|------|------|------|------|------|-----|
| $V_{(\text{H}^+, \mu\text{l})}$  | 10.0 | 8.0  | 6.0  | 4.0  | 3.0  | 2.5  | 2.0  | 1.5  | 1.0  | 0.5  | 0    |      |      |      |      |      |     |
| $V_{(\text{OH}^-, \mu\text{l})}$ |      |      |      |      |      |      |      |      |      |      |      | 0    | 0.2  | 0.4  | 0.8  | 1.0  | 1.5 |
| pH <sub>(1)</sub>                | 3.22 | 3.38 | 3.91 | 4.12 | 4.82 | 5.09 | 5.53 | 6.03 | 6.41 | 6.79 | 7.11 | 7.72 | 8.11 | 8.18 | 8.32 | 8.54 |     |
| pH <sub>(2)</sub>                | 3.22 | 3.37 | 3.58 | 3.80 | 4.25 | 5.28 | 5.96 | 6.40 | 6.63 | 7.04 | 7.25 | 7.52 | 7.98 | 8.09 | 8.21 | 8.44 |     |
| pH <sub>(3)</sub>                | 3.21 | 3.38 | 3.60 | 4.09 | 4.36 | 5.32 | 5.78 | 6.32 | 6.66 | 6.96 | 7.23 | 7.49 | 8.02 | 8.13 | 8.20 | 8.49 |     |
| pH <sub>(eve)</sub>              | 3.21 | 3.38 | 3.40 | 4.00 | 4.47 | 5.23 | 5.75 | 6.25 | 6.57 | 6.93 | 7.20 | 7.58 | 8.03 | 8.13 | 8.24 | 8.48 |     |
| <b>(b)</b>                       |      |      |      |      |      |      |      |      |      |      |      |      |      |      |      |      |     |
| $V_{(\text{H}^+, \mu\text{l})}$  | 10.0 | 8.0  | 6.0  | 4.0  | 3.0  | 2.5  | 2.0  | 1.5  | 1.0  | 0.5  | 0    |      |      |      |      |      |     |
| $V_{(\text{OH}^-, \mu\text{l})}$ |      |      |      |      |      |      |      |      |      |      |      | 0    | 0.2  | 0.4  | 0.8  | 1.0  | 1.5 |
| pH <sub>(1)</sub>                | 2.92 | 3.02 | 3.22 | 3.25 | 4.19 | 4.49 | 5.11 | 5.95 | 6.34 | 6.67 | 6.98 | 7.31 | 7.38 | 7.49 | 7.78 | 8.40 |     |
| pH <sub>(2)</sub>                | 2.92 | 3.02 | 3.25 | 3.27 | 4.13 | 4.62 | 4.98 | 5.57 | 5.94 | 6.23 | 6.38 | 7.08 | 7.19 | 7.55 | 7.84 | 8.43 |     |
| pH <sub>(3)</sub>                | 2.93 | 3.00 | 3.29 | 3.32 | 4.43 | 4.67 | 5.05 | 5.76 | 6.04 | 6.40 | 6.62 | 7.10 | 7.35 | 7.44 | 7.80 | 8.41 |     |
| pH <sub>(eve)</sub>              | 2.92 | 3.01 | 3.25 | 3.28 | 4.22 | 4.66 | 5.05 | 5.76 | 6.10 | 6.43 | 6.66 | 7.16 | 7.30 | 7.49 | 7.81 | 8.41 |     |

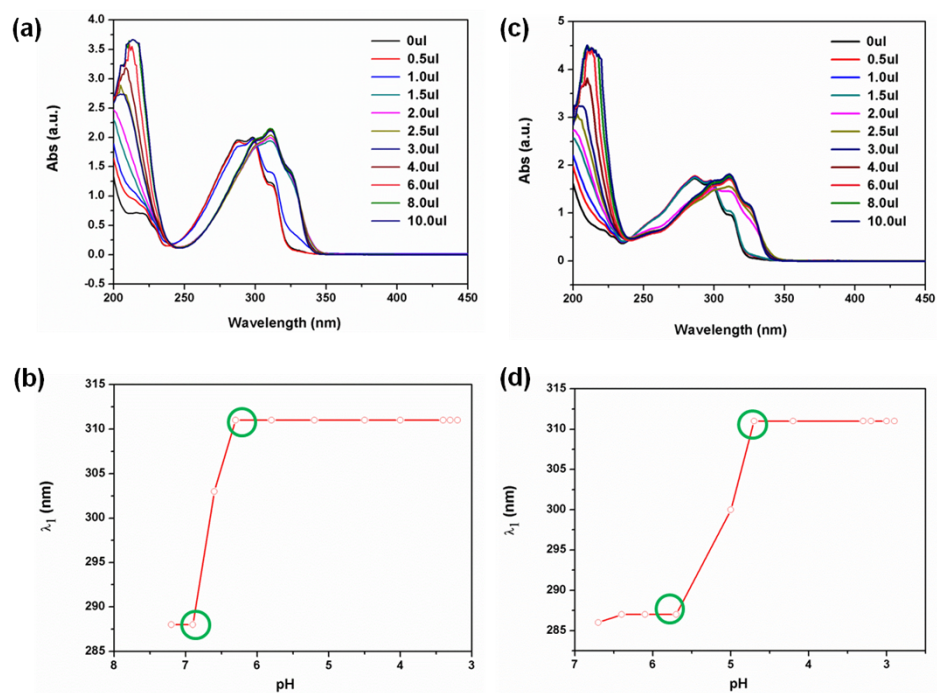

Figure S2. UV-visible absorption spectra recorded during titration of a solution of (a) bpe-Mn and (c) bpe-CMP with 0.8M HNO<sub>3</sub>. [bpe-Mn] = [bpe-CMP] =  $5 \times 10^{-5}$  mol/L<sup>-1</sup>). The changes of  $\lambda_1$  at different pH value for (b) bpe-Mn and (d) bpe-CMP, which also show red shift as pH reduce.

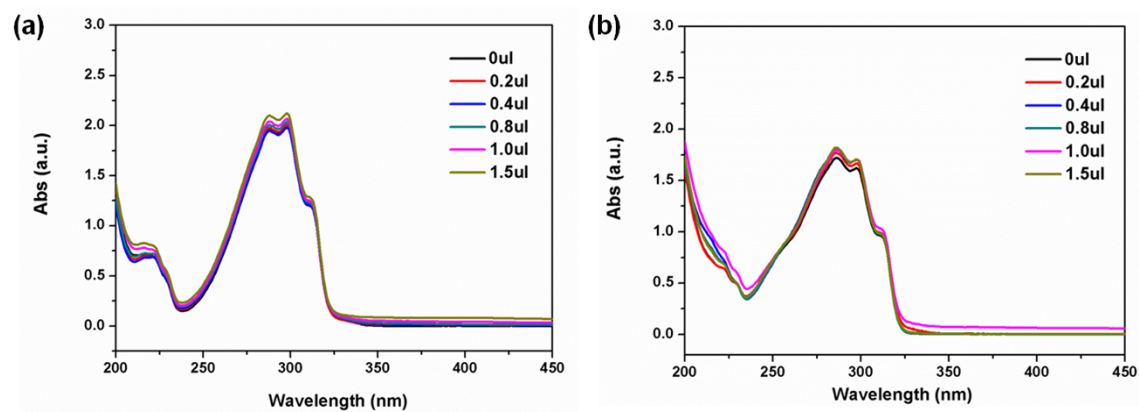

Figure S3. UV-visible absorption spectra recorded during titration of a solution of (a) bpe-Mn and (b) bpe-CMP with 1.0M NaOH. [bpe-Mn] = [bpe-CMP] =  $5 \times 10^{-5}$  mol/L<sup>-1</sup>).

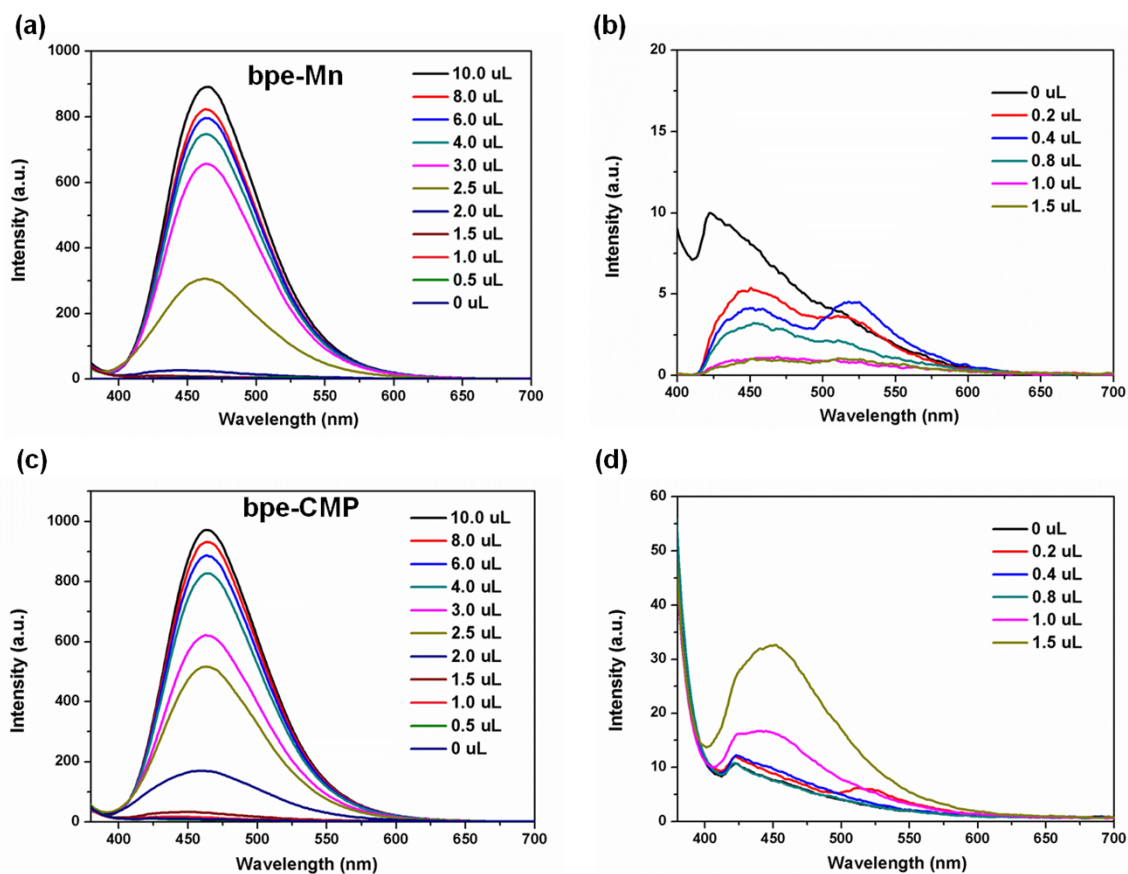

**Figure S4.** Fluorescence titration spectra ( $\lambda_{\text{ex}}=365\text{nm}$ ) of a solution of bpe-Mn and bpe-CMP ( $[\text{bpe-Mn}] = [\text{bpe-CMP}] = 5.0 \times 10^{-5} \text{ molL}^{-1}$ ) with  $\text{HNO}_3$  (0.8M, *a and c*) or  $\text{NaOH}$  (1M, *b and d*).

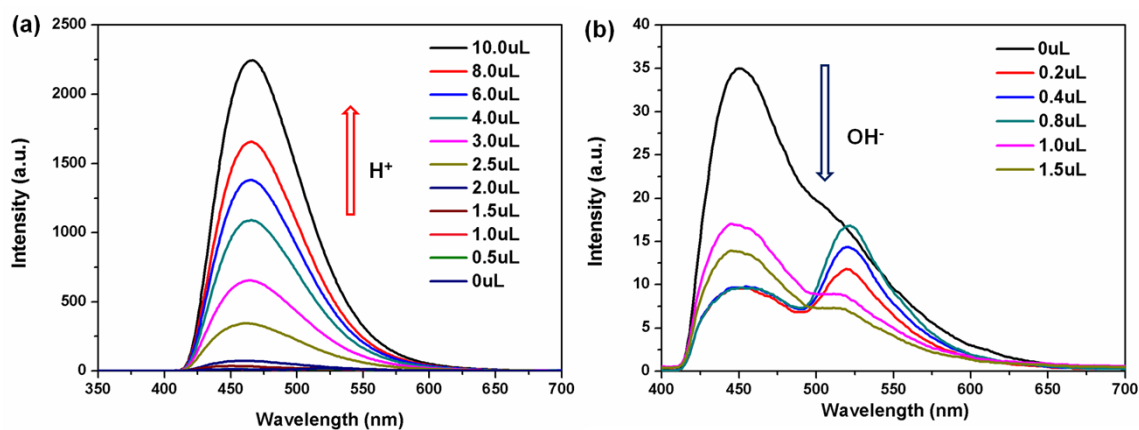

**Figure S5.** Fluorescence titration spectra ( $\lambda_{\text{ex}}=365\text{nm}$ ) of a solution of CMP-bpe-Co ( $[\text{bpe}]=[\text{CMP}]=[\text{Co}^{2+}]=5.0 \times 10^{-5} \text{ molL}^{-1}$ ) with  $\text{HNO}_3$  (0.8M, *a and c*) or  $\text{NaOH}$  (1M, *b and d*).

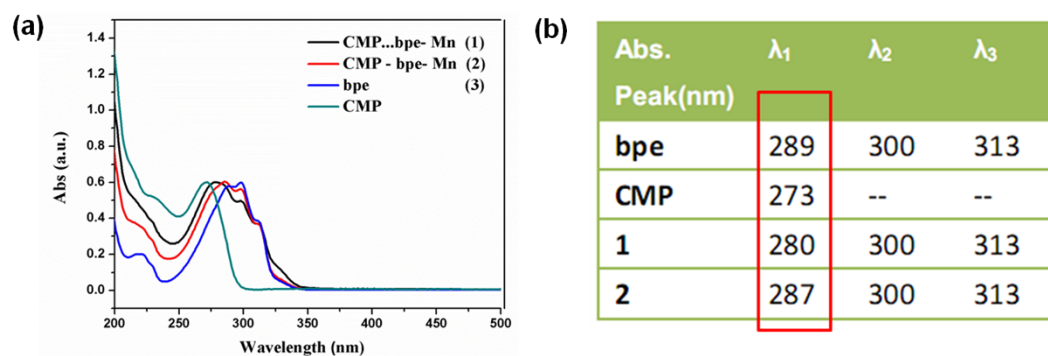

**Figure S6.** Room-temperature UV-vis absorption spectra (a) and the relative absorption peaks (b) in water solution of complex **1** (black line), **2** (red line), bpe (blue line) and CMP (cyan line).  $[1] = [2] = [\text{bpe}] = [\text{CMP}] = 5.0 \times 10^{-5} \text{ molL}^{-1}$ . Samples are dissolved in aqueous solution and the thickness of sample cell is 1cm.

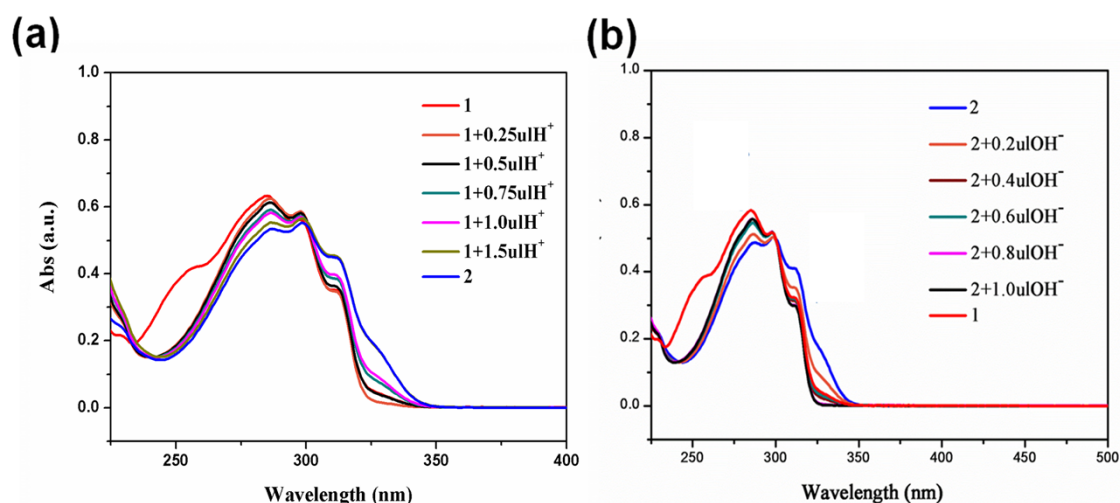

**Figure S7.** UV-vis titration spectra for the reversible convert between **1** and **2** adjusted by 1M HCl or NaOH.

### Section 3 Crystallography date and Structural Information.

**Table S3.** Crystal Data and Structure Refinement of Complexes

| Complex           | 1                                                                  | 2                                                                                | 3                                                                        | 5                                                                                |
|-------------------|--------------------------------------------------------------------|----------------------------------------------------------------------------------|--------------------------------------------------------------------------|----------------------------------------------------------------------------------|
| Empirical formula | $\text{C}_{21} \text{H}_{36} \text{N}_5 \text{O}_{15} \text{P Mn}$ | $\text{C}_{60} \text{H}_{94} \text{N}_{16} \text{O}_{43} \text{P}_4 \text{Mn}_2$ | $\text{C}_{60} \text{H}_{64} \text{Cl}_2 \text{Mn N}_{10} \text{O}_{15}$ | $\text{C}_{60} \text{H}_{94} \text{N}_{16} \text{O}_{43} \text{P}_4 \text{Co}_2$ |
| Formula weight    | 684.46                                                             | 1961.27                                                                          | 1291.5                                                                   | 1969.25                                                                          |
| Wavelength (Å)    | 0.71073                                                            | 0.71073                                                                          | 0.71073                                                                  | 0.71073                                                                          |
| Temperature(K)    | 153.15(2)                                                          | 296(2)                                                                           | 293(2)                                                                   | 153.15(2)                                                                        |
| Crystal system    | Monoclinic                                                         | Orthorhombic                                                                     | Monoclinic                                                               | Orthorhombic                                                                     |

|                                                |                 |                                               |                    |                                               |
|------------------------------------------------|-----------------|-----------------------------------------------|--------------------|-----------------------------------------------|
| space group                                    | P2 <sub>1</sub> | P2 <sub>1</sub> 2 <sub>1</sub> 2 <sub>1</sub> | P2 <sub>1</sub> /c | P2 <sub>1</sub> 2 <sub>1</sub> 2 <sub>1</sub> |
| a (Å)                                          | 9.2640(19)      | 13.870(3)                                     | 16.568(3)          | 13.666(3)                                     |
| b (Å)                                          | 12.020(2)       | 14.057(3)                                     | 13.671(3)          | 13.939(3)                                     |
| c (Å)                                          | 13.833(3)       | 20.780(5)                                     | 29.949(10)         | 20.703(4)                                     |
| α (°)                                          | 90              | 90                                            | 90                 | 90                                            |
| β (°)                                          | 106.95(3)       | 90                                            | 111.38(3)          | 90                                            |
| γ (°)                                          | 90              | 90                                            | 90                 | 90                                            |
| Volume (Å <sup>3</sup> )                       | 1473.5(5)       | 4051.5(16)                                    | 6317(3)            | 3943.7(14)                                    |
| Z                                              | 2               | 2                                             | 4                  | 2                                             |
| <i>D</i> <sub>calc.</sub> (g/cm <sup>3</sup> ) | 1.543           | 1.608                                         | 1.358              | 1.658                                         |
| Abs coeff (mm <sup>-1</sup> )                  | 0.581           | 0.501                                         | 0.367              | 0.615                                         |
| F (000)                                        | 714             | 2040                                          | 2692               | 2048                                          |
| θ Range /°                                     | 2.36-29.14      | 1.75-28.28                                    | 3.03-27.49         | 1.97-29.14                                    |
| Reflections collected / unique                 | 13197/7588      | 24639 / 9673                                  | 50160/14436        | 34938/10554                                   |
| Completeness to theta                          | 29.14, 99.4 %   | 28.28, 98.3 %                                 | 27.49, 99.7%       | 29.14, 99.8%                                  |
| GOF on F <sup>2</sup>                          | 0.967           | 1.044                                         | 1.164              | 1.042                                         |
| R1,wR2 [I >2σ(I)]                              | 0.0394, 0.0686  | 0.0609, 0.1432                                | 0.0959, 0.2410     | 0.0645, 0.11679                               |
| R1,wR2 (all data)                              | 0.0497, 0.0725  | 0.0977, 0.1627                                | 0.1164, 0.2565     | 0.0781, 0.1803                                |
| Flack parameter                                | -0.001(12)      | -0.03(3)                                      | --                 | -0.009(17)                                    |

**Table S4.** Selected Bond Lengths (Å) and Angles (deg) in Coordination Metal Environments in **1**, **2** and **3**<sup>a</sup>.

| <b>1</b>         |            |                   |            |
|------------------|------------|-------------------|------------|
| Mn(1)-O(9)       | 2.1252(17) | Mn(1)-O(8)        | 2.1372(17) |
| Mn(1)-O(11)      | 2.2011(17) | Mn(1)-O(10)       | 2.2133(17) |
| Mn(1)-N(3)       | 2.2578(19) | Mn(1)-N(4)        | 2.2699(19) |
| O(9)-Mn(1)-O(8)  | 91.53(7)   | O(9)-Mn(1)-O(11)  | 173.83(7)  |
| O(8)-Mn(1)-O(11) | 92.42(7)   | O(9)-Mn(1)-O(10)  | 90.11(7)   |
| O(8)-Mn(1)-O(10) | 177.87(7)  | O(11)-Mn(1)-O(10) | 86.06(7)   |



|                  |            |                  |                 |
|------------------|------------|------------------|-----------------|
| O(9)-Mn(1)-N(3)  | 92.23(7)   | O(8)-Mn(1)-N(3)  | 88.26(7)        |
| O(11)-Mn(1)-N(3) | 92.62(7)   | O(10)-Mn(1)-N(3) | 90.32(7)        |
| O(9)-Mn(1)-N(4)  | 89.52(7)   | O(8)-Mn(1)-N(4)  | 92.11(7)        |
| O(11)-Mn(1)-N(4) | 85.61(7)   | O(10)-Mn(1)-N(4) | 89.26(7)        |
| N(3)-Mn(1)-N(4)  | 178.20(8)  |                  |                 |
| <b>2</b>         |            |                  |                 |
| Mn(1)-O(6)       | 2.146(3)   | Mn(1)-O(3)       | 2.154(3)        |
| Mn(1)-O(5)       | 2.198(3)   | Mn(1)-N(8)       | 2.264(4)        |
| Mn(1)-O(4)       | 2.284(4)   | Mn(1)-N(7)       | 2.264(4)        |
| O(6)-Mn(1)-O(3)  | 92.72(13)  | O(6)-Mn(1)-O(5)  | 86.79(11)       |
| O(3)-Mn(1)-O(5)  | 177.82(12) | O(6)-Mn(1)-N(8)  | 95.98(15)       |
| O(3)-Mn(1)-N(8)  | 90.39(14)  | O(5)-Mn(1)-N(8)  | 91.78(14)       |
| O(6)-Mn(1)-O(4)  | 178.62(12) | O(3)-Mn(1)-O(4)  | 88.66(13)       |
| O(5)-Mn(1)-O(4)  | 91.83(13)  | N(8)-Mn(1)-O(4)  | 83.97(15)       |
| O(6)-Mn(1)-N(7)  | 92.58(14)  | O(3)-Mn(1)-N(7)  | 86.14(13)       |
| O(5)-Mn(1)-N(7)  | 91.75(13)  | N(8)-Mn(1)-N(7)  | 170.83(14)      |
| O(4)-Mn(1)-N(7)  | 87.55(15)  |                  |                 |
| <b>3</b>         |            |                  |                 |
| Mn(1)-O(19)      | 2.060(3)   | Mn(1)-O(8)       | 2.062(3)        |
| Mn(1)-N(4)       | 2.115(3)   | Mn(1)-N(2)       | 2.112(3)        |
| Mn(1)-N(1)       | 2.136(3)   | Mn(1)-N(3)       | 2.152(3)        |
| O(19)-Mn(1)-O(8) | 178.51(11) | O(19)-Mn(1)-N(4) | 90.28(11)       |
| O(8)-Mn(1)-N(4)  | 91.13(11)  | O(19)-Mn(1)-N(2) | 87.79(11)       |
| O(8)-Mn(1)-N(2)  | 91.79(11)  | O(19)-Mn(1)-N(1) | 91.18(12)       |
| O(8)-Mn(1)-N(1)  | 89.30(11)  | N(4)-Mn(1)-N(1)  | 89.48(12)       |
| N(2)-Mn(1)-N(1)  | 177.59(12) | O(19)-Mn(1)-N(3) | 89.50(10)       |
| O(8)-Mn(1)-N(3)  | 89.08(10)  | N(4)-Mn(1)-N(3)  | 179.54(12)      |
| N(2)-Mn(1)-N(3)  | 91.24(11)  | N(1)-Mn(1)-N(3)  | 90.93(11)       |
| N(4)-Mn(1)-N(2)  | 88.34(11)  |                  |                 |
| <b>5</b>         |            |                  |                 |
| Co(1)-O(2)       | 2.065(3)   | Co(1)-O(3)       | 2.107(3)        |
| Co(1)-O(4)       | 2.132(3)   | Co(1)-N(1)       | 2.140(3)        |
| Co(1)-N(2)       | 2.147(3)   | Co(1)-O(1)       | 2.164(3)        |
| O(2)-Co(1)-O(3)  | 91.52(11)  | O(2)-Co(1)-O(4)  | 177.71(12)      |
| O(3)-Co(1)-O(4)  | 87.04(11)  | O(2)-Co(1)-N(1)  | 86.63(12)       |
| O(3)-Co(1)-N(1)  | 91.70(12)  | O(4)-Co(1)-N(1)  | O(4)-Co(1)-N(1) |
| O(2)-Co(1)-N(2)  | 90.95(13)  | O(3)-Co(1)-N(2)  | 94.24(13)       |
| O(4)-Co(1)-N(2)  | 90.92(13)  | N(1)-Co(1)-N(2)  | 173.65(14)      |
| O(2)-Co(1)-O(1)  | 89.19(12)  | O(3)-Co(1)-O(1)  | 178.59(13)      |
| O(4)-Co(1)-O(1)  | 92.29(12)  | N(1)-Co(1)-O(1)  | 89.56(13)       |
| N(2)-Co(1)-O(1)  | 84.54(13)  |                  |                 |

**Table S5.** Hydrogen Bond Distances (Å) and Angles (deg) in **1-3**.

| D-H...A        | d(D-H) | d(H...A) | d(D...A) | ∠(DHA) | Symmetry transformation for acceptor |
|----------------|--------|----------|----------|--------|--------------------------------------|
| 1              |        |          |          |        |                                      |
| N20-H20A...O15 | 0.860  | 2.330    | 3.170    | 165.56 | -x+1, y+1/2, -z+1                    |
| N20-H20B...O5  | 0.860  | 2.000    | 2.849    | 168.82 | -x+1, y+1/2, -z+1                    |
| O8-H8C...O6    | 0.850  | 1.827    | 2.677    | 179.49 | -x+1, y+1/2, -z+1                    |
| O8-H8D...O5    | 0.850  | 1.822    | 2.672    | 179.62 |                                      |
| O9-H9C...O6    | 0.850  | 1.866    | 2.714    | 175.60 |                                      |
| O9-H9D...O14   | 0.850  | 1.767    | 2.615    | 175.62 | -x+1, y-1/2, -z+1                    |
| O10-H10C...N20 | 0.850  | 2.400    | 3.224    | 163.65 | -x, y-1/2, -z+1                      |
| O10-H10D...O7  | 0.850  | 1.820    | 2.643    | 162.52 | x-1, y, z                            |
| O11-H11D...O15 | 0.850  | 1.891    | 2.741    | 178.36 | x-1, y, z                            |
| O11-H11C...O7  | 0.850  | 1.740    | 2.590    | 179.20 | -x+1, y+1/2, -z+1                    |
| O12-H12...N1   | 0.820  | 2.032    | 2.852    | 177.74 | -x+1, y-1/2, -z+2                    |
| O13-H13A...O2  | 0.820  | 1.792    | 2.589    | 163.89 | -x+1, y-1/2, -z+2                    |
| O14-H14C...O11 | 0.850  | 2.069    | 2.918    | 176.04 | x+1, y, z                            |
| O14-H14D...O5  | 0.850  | 1.919    | 2.767    | 176.35 |                                      |
| O15-H15B...O5  | 0.847  | 1.883    | 2.716    | 167.27 |                                      |
| O15-H15D...O12 | 0.850  | 2.080    | 2.887    | 158.36 | x, y, z-1                            |
| O16-H16C...O6  | 0.850  | 1.974    | 2.823    | 175.98 | -x+1, y+1/2, -z+1                    |
| O16-H16D...O13 | 0.850  | 1.977    | 2.826    | 175.68 | -x+1, y+1/2, -z+1                    |
| 2              |        |          |          |        |                                      |
| N3-H3A...O19   | 0.860  | 2.002    | 2.853    | 170.25 | -x, y+1/2, -z+1/2                    |
| N3-H3B...O8    | 0.860  | 2.218    | 3.060    | 166.26 | -x+1, y+1/2, -z+1/2                  |
| N6-H6A...O1    | 0.860  | 2.031    | 2.886    | 172.79 | x, y-1/2, -z+1/2                     |
| N6-H6B...O10   | 0.860  | 2.488    | 3.307    | 159.40 | -x+1, y-1/2, -z+1/2                  |
| O3-H3E...O11   | 0.850  | 1.771    | 2.616    | 172.24 | -x+1, y-1/2, -z+1/2                  |
| O3-H3F...O23   | 0.850  | 1.858    | 2.699    | 170.03 | -x+3/2, -y+1, z-1/2                  |
| O4-H4C...O23   | 0.857  | 2.514    | 3.371    | 179.17 | -x+3/2, -y+1, z-1/2                  |
| O4-H4D...O11   | 0.874  | 1.844    | 2.718    | 178.79 |                                      |
| O7-H7C...O5    | 0.820  | 1.755    | 2.563    | 168.20 |                                      |
| O10-H10D...O22 | 0.820  | 2.107    | 2.712    | 130.52 |                                      |
| O14-H14A...O7  | 0.820  | 2.304    | 3.018    | 145.81 | x-1/2, -y+3/2, -z                    |
| O15-H15A...O21 | 0.820  | 1.973    | 2.750    | 157.84 | x, y, z-1                            |
| O16-H16...O10  | 0.820  | 1.890    | 2.627    | 148.84 | x-1/2, -y+3/2, -z                    |
| O18-H18A...O8  | 0.820  | 1.829    | 2.637    | 168.19 | x-1/2, -y+1/2, -z                    |
| O20-H20C...O8  | 0.850  | 2.483    | 3.328    | 172.72 | x-1/2, -y+1/2, -z+1                  |
| O20-H20D...O16 | 0.850  | 2.301    | 3.028    | 143.62 | x, y-1, z+1                          |
| O21-H21E...O1  | 0.850  | 2.289    | 3.098    | 159.07 | x+1/2, -y+3/2, -z+1                  |
| O21-H21F...O14 | 0.850  | 2.530    | 3.338    | 159.12 | x+1/2, -y+3/2, -z+1                  |
| O22-H22C...O15 | 0.850  | 2.007    | 2.728    | 142.19 | x+1/2, -y+3/2, -z                    |

---

|                |       |       |       |        |                       |
|----------------|-------|-------|-------|--------|-----------------------|
| O22-H22D...O23 | 0.850 | 2.229 | 3.041 | 146.04 | $x+1/2, -y+3/2, -z+1$ |
| O23-H23B...O18 | 0.850 | 2.156 | 2.687 | 120.28 | $x+1, y, z+1$         |
| O23-H23D...O20 | 0.850 | 1.978 | 2.828 | 178.41 | $x+1/2, -y+1/2, -z+2$ |

3

|                 |       |       |       |        |                       |
|-----------------|-------|-------|-------|--------|-----------------------|
| O8-H8...N11     | 0.820 | 1.963 | 2.771 | 168.29 | $-x+1, -y+2, -z+1$    |
| O8-H8C...O13    | 0.850 | 1.856 | 2.681 | 163.06 | $x+1, y, z$           |
| O19-H19...N10   | 0.820 | 1.968 | 2.779 | 169.62 | $-x+2, -y+2, -z+2$    |
| O19-H19D... O20 | 0.850 | 1.830 | 2.658 | 164.68 |                       |
| O13-H13C...O21  | 0.849 | 1.909 | 2.754 | 173.61 | $-x, -y+1, -z+1$      |
| O13-H13D...N6   | 0.849 | 1.982 | 2.828 | 173.90 | $x, -y+3/2, z+1/2$    |
| O20-H20C...O22  | 0.850 | 1.910 | 2.759 | 177.44 | $-x+1, y+1/2, -z+3/2$ |
| O20-H20D...N5   | 0.851 | 1.898 | 2.749 | 177.67 |                       |
| O21-H21C...N20  | 0.851 | 1.984 | 2.827 | 170.79 | $x-1, y, z$           |
| O21-H21D...O11  | 0.850 | 2.059 | 2.906 | 174.25 | $-x+1, -y+1, -z+1$    |
| O22-H22C...N7   | 0.850 | 1.969 | 2.817 | 175.48 |                       |
| O22-H22D...O18  | 0.851 | 2.136 | 2.981 | 172.16 | $-x+1, y-1/2, -z+3/2$ |
| O23-H23C...O20  | 0.851 | 1.994 | 2.839 | 171.75 | $x, y-1, z$           |
| O23-H23D...O22  | 0.851 | 2.110 | 2.955 | 171.68 |                       |

5

|                |       |       |       |        |                       |
|----------------|-------|-------|-------|--------|-----------------------|
| N7-H7A...O8    | 0.860 | 1.994 | 2.846 | 170.66 | $-x+1, y+1/2, -z+1/2$ |
| N7-H7B...O16   | 0.860 | 2.102 | 2.950 | 168.36 | $-x+2, y+1/2, -z+1/2$ |
| N8-H8A...O7    | 0.860 | 2.002 | 2.859 | 174.10 | $-x+1, y-1/2, -z+1/2$ |
| N8-H8A...O14   | 0.860 | 2.319 | 3.132 | 157.79 | $-x+2, y-1/2, -z+1/2$ |
| O1-H1C...O22   | 0.850 | 1.979 | 2.672 | 137.99 |                       |
| O1-H1D...O24   | 0.850 | 2.619 | 3.316 | 140.14 | $-x+3/2, -y+1, z-1/2$ |
| O2-H2C...O22   | 0.850 | 1.767 | 2.612 | 172.72 | $-x+2, y-1/2, -z+1/2$ |
| O2-H2D...O24   | 0.850 | 1.852 | 2.699 | 174.07 | $-x+3/2, -y+1, z-1/2$ |
| O9-H9A...O14   | 0.820 | 1.844 | 2.648 | 166.26 | $x-1/2, -y+3/2, -z$   |
| O10-H10...O21  | 0.820 | 2.229 | 2.946 | 146.08 | $x-1/2, -y+3/2, -z$   |
| O11-H11A...O16 | 0.820 | 1.817 | 2.623 | 167.33 | $x-1/2, -y+1/2, -z$   |
| O12-H12A...O17 | 0.820 | 1.932 | 2.721 | 161.22 | $x+1/2, -y+3/2, -z$   |
| O14-H14C...O17 | 0.850 | 1.871 | 2.721 | 179.24 | $x+1, y, z$           |
| O17-H17C...O5  | 0.850 | 2.404 | 3.244 | 169.47 | $x-1/2, -y+3/2, -z$   |
| O17-H17B...O24 | 0.865 | 2.048 | 2.912 | 176.91 | $x-1/2, -y+3/2, -z+1$ |
| O18-H18E...O7  | 0.850 | 2.218 | 3.034 | 160.80 | $x-1/2, -y+3/2, -z+1$ |
| O18-H18F...O10 | 0.850 | 2.354 | 3.168 | 160.41 | $x-1/2, -y+3/2, -z+1$ |
| O19-H19D...O10 | 0.850 | 2.327 | 3.159 | 166.17 | $x, y-1, z+1$         |
| O19-H19BD...N7 | 0.850 | 2.417 | 3.100 | 137.81 | $-x+3/2, -y+1, z+1/2$ |
| O21-H21E...O4  | 0.979 | 1.567 | 2.542 | 173.58 |                       |
| O24-H24C...O11 | 0.850 | 1.844 | 2.693 | 178.02 | $x, y, z+1$           |
| O24-H24D...O19 | 0.850 | 1.904 | 2.754 | 177.62 | $x-1/2, -y+1/2, -z+2$ |

---

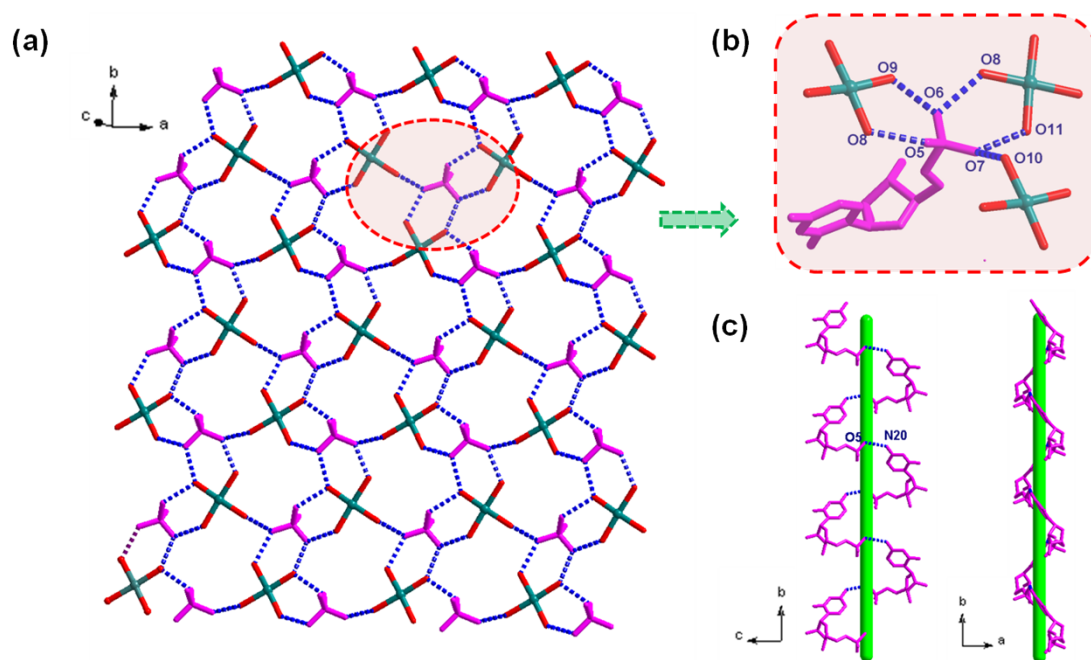

**Figure S8.** (a) 2D Hydrogen bonding layer of complex 1 in *ab* plane formed by hydrogen bonds between coordination water molecules and acceptor atoms of CMP<sup>2-</sup> ligands. (b) Perspective view of hydrogen bonds between CMP<sup>2-</sup> ligands and coordination molecules. (c) Supramolecular helix formed by CMP ligands in the form of head-to-tail through hydrogen bonding (N20-H20B  $\cdots$  O5, 2.849Å and 168.75 °).

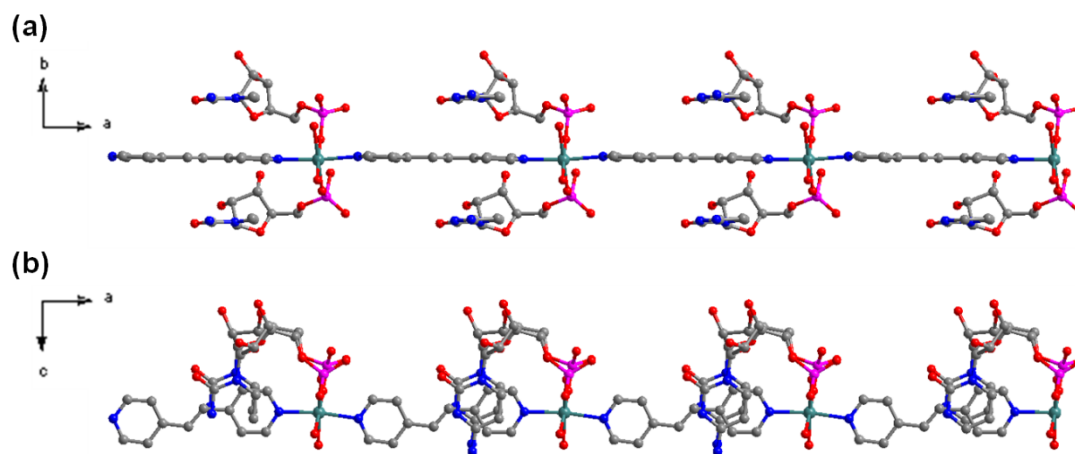

**Figure S9.** 1D chain of 2 viewed down from *c* axis (a) and *b* axis (b).

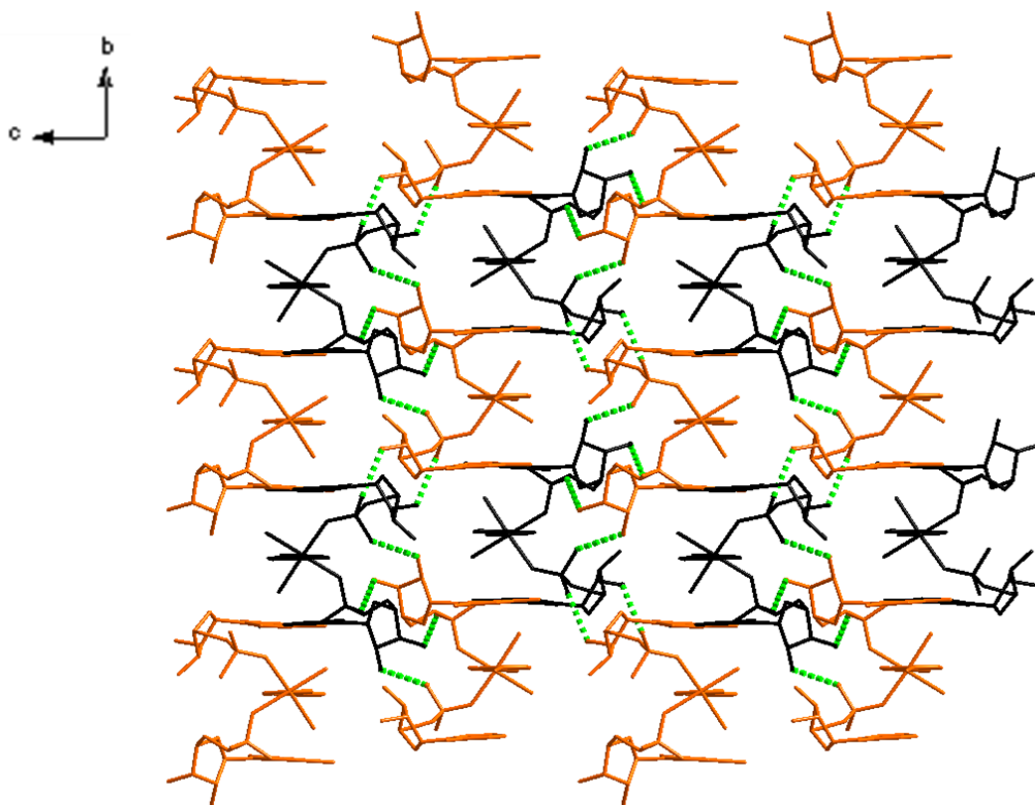

**Figure S10.** The 3D stacking structure picture of **2** assembled from interlayer hydrogen-bonding interactions viewed down from *c* axis.

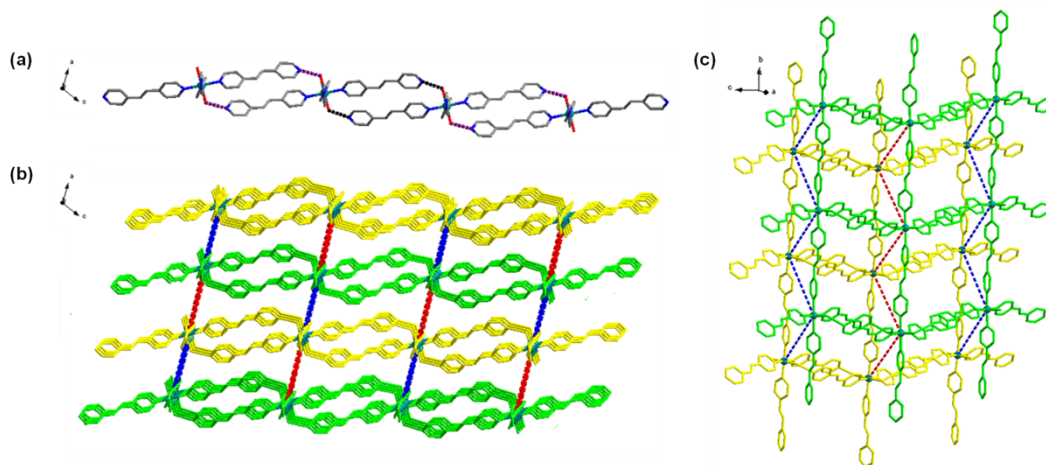

**Figure S11.** (a) 2D layer of **3** formed by inter-linear hydrogen bonding. (b) Two kinds of Mn...Mn distance between layers shown in red and blue dotted lines, respectively. (c) Two adjacent layers with 2D grid structure in **3**.

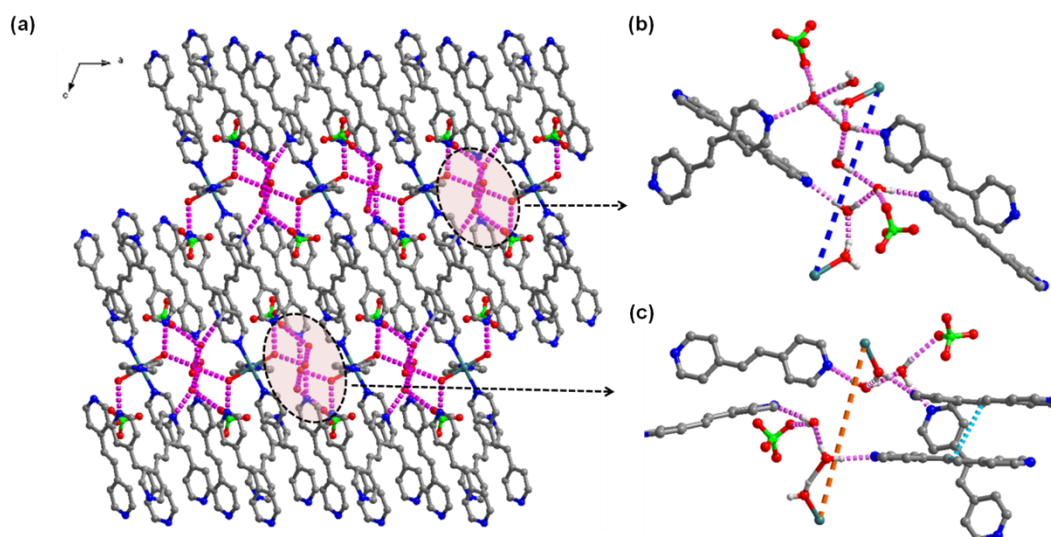

**Figure S12.** 3D supramolecular architecture of **3** assembled by noncovalent interactions (b and c), including hydrogen bonds formed between coordinated water molecules and free bpe, ClO<sub>4</sub><sup>-</sup> or water molecules, as well as  $\pi$ - $\pi$  stacking between adjacent bpe molecules.

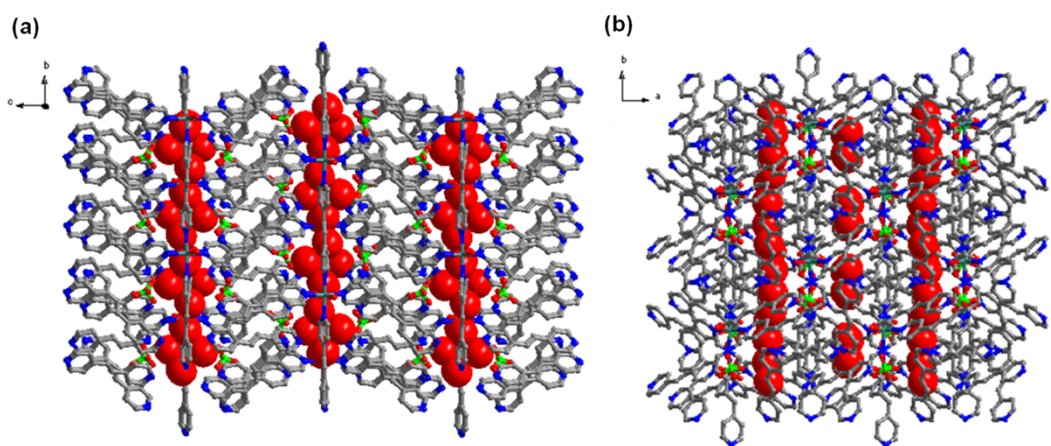

**Figure S13.** 3D supramolecular architecture of **3** with 1D channels filled with guest water molecules((a) viewed down from *a* axis, and (b) from *c* axis).

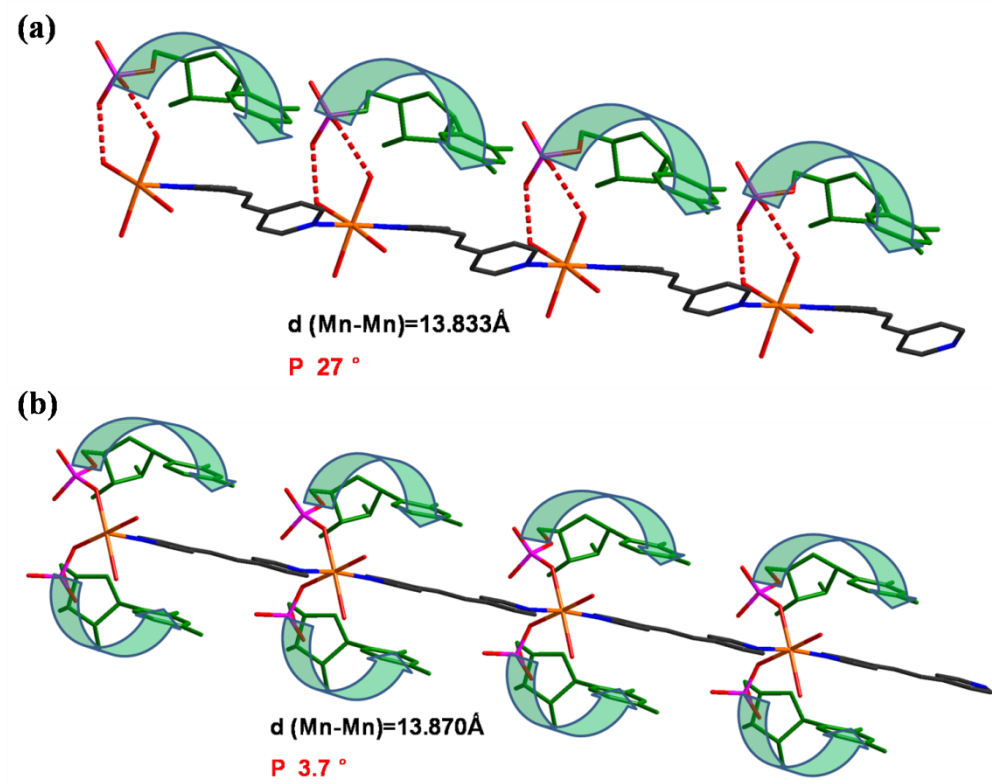

**Figure S14.** (a) P-EAC in **1** with clockwise orientated CMP ligand surrounding the axis of bpe. (b) P-EAC in **2** with equal clockwise and counterclockwise orientated chiral inducers surrounding the axis of bpe.

### Section 3 XRPD Patterns and IR spectra

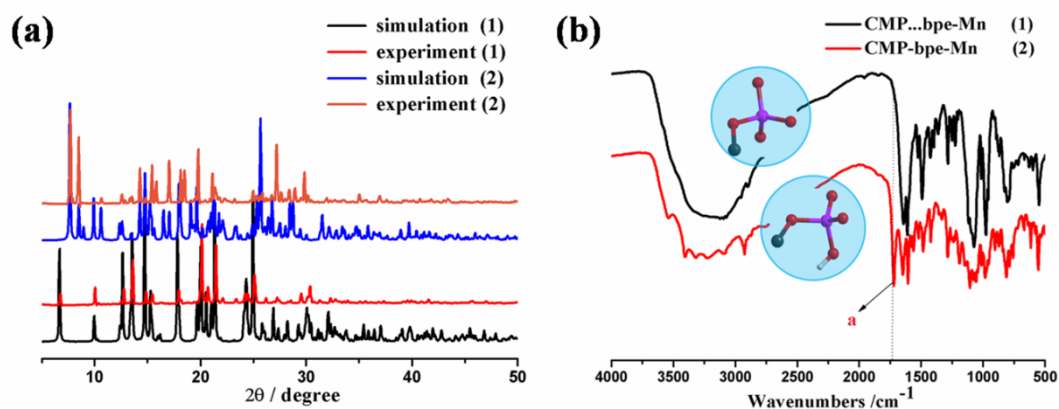

**Figure S15.** (a) XRPD patterns show the comparison between the experimental value and simulated ones for complexes **1** and **2**. **1** and **2** prepared under different acidic conditions show different structures. (b) IR spectra of complexes **1** and **2**. A new absorption *a* appeared in the spectrum of **2** because there is one more P-O Vibration mode, which can be explained by the protonation of one phosphate oxygen atom at more acidic condition.

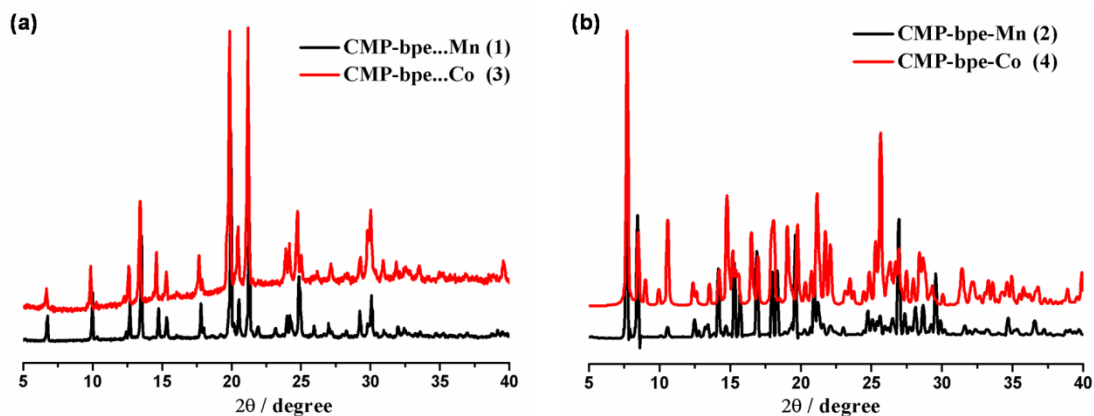

**Figure S16.** Comparison of PXRD patterns between **1** and **3** (a) as well as **2** and **4** (b). It is clearly that complexes of different kinds of metal ions adopt the same structure at similar acidity conditions.

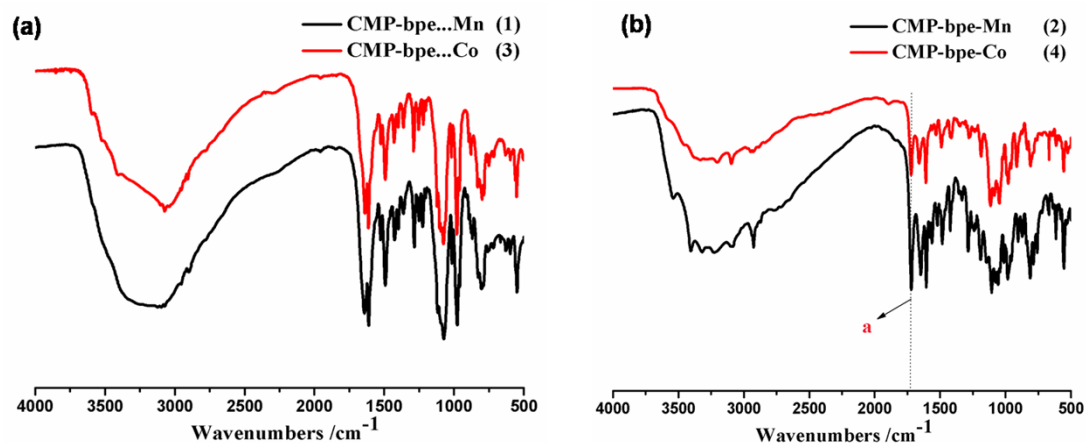

**Figure S17.** IR spectra of complexes **1** and **3**(a) as well as **2** and **4** (b). A new absorption peak **a** appeared in the spectra of **2** and **4** because there is one more P-O Vibration mode, which can be explain by the protonation of one phosphate oxygen atom at more acidic condition.



## Section 5 Liquid-State CD Spectra.

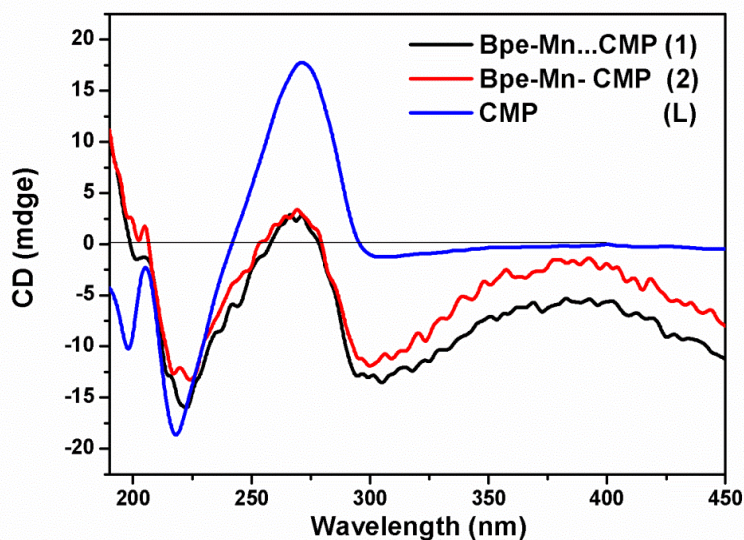

**Figure S18.** The liquid-state CD spectra of CMP ligands and its complexes **1** and **2** in water at 20°C. The spectra was obtained by measuring a 0.02mM solution in a 1mm cell. The typical CD spectrum of CMP illustrates that the nucleotides ligand is D-ribonucleotide, which has a positive band near 271nm. The weak negative band centred at 300nm in the spectra of **1** and **2** demonstrates there exist interaction between CMP ligand and the metal ions, which can prevent the mutarotation, making ligands keep the  $\beta$ -anomers in their complexes.

## Section 6 Solid-State UV-vis Spectra.

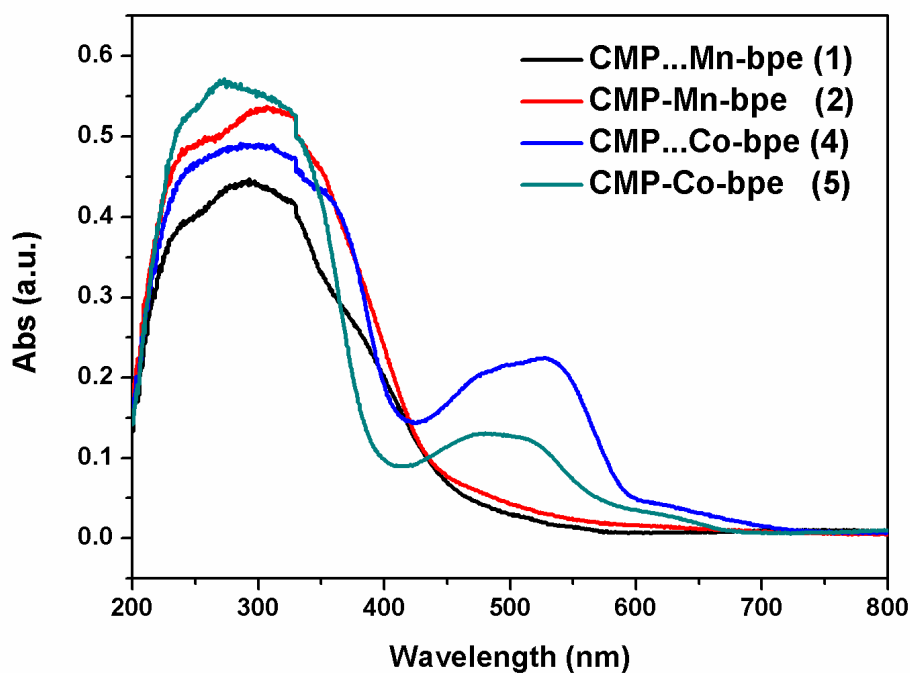

**Figure S19.** The solid-state UV-vis spectra of complexes **1**, **2**, **4**, and **5** at room temperature. There exist d-d electron transitions in the region of 400-600nm for complexes **4** and **5**.

## Section 7 TGA (Thermogravimetric Analysis).

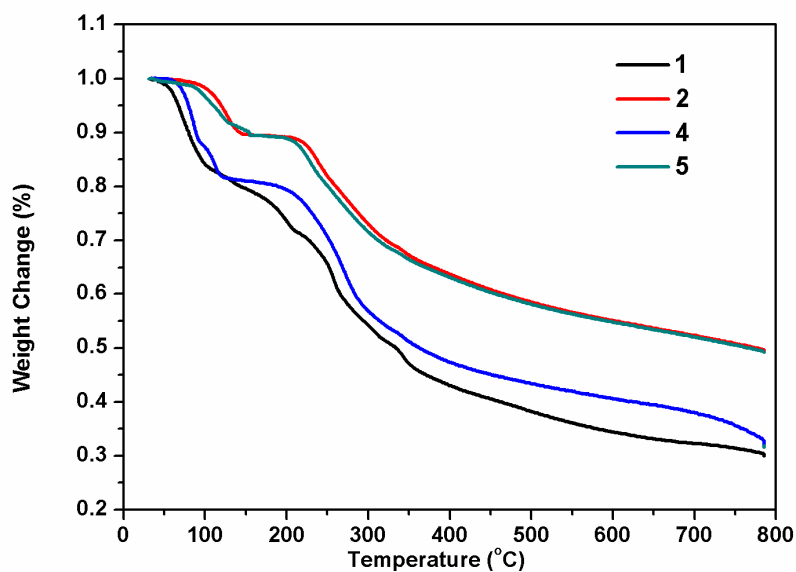

**Figure S20.** TG analysis curves of **1**, **2**, **4**, and **5**. The mass loss of ca. 18.41 % from 80.2 °C to 222.4 °C is related to the loss of guest water solvates and coordinated water molecules (calculated value 18.32 %) for **1**. And it begin to collapse at about 200.0°C. The first weight loss stage of **2** is from 99.8°C to 144.9 °C, and the mess loss (cal.10.09%, calculated value 10.22%) is also related to the loss of guest and coordinated water molecules. Complex **2** showed better thermal stability than **1**, the collapse temperature of which is about 221.5°C. The thermal properties of **4** and **5** are similar to **1** and **2**, respectively, which give reasons that there are three guest water molecules in complex **4**. However, the TG analysis of **3** is not studied because of its explosive components ( $\text{ClO}_4^-$ ).

## Section 8 Crystal-to-crystal transformation.

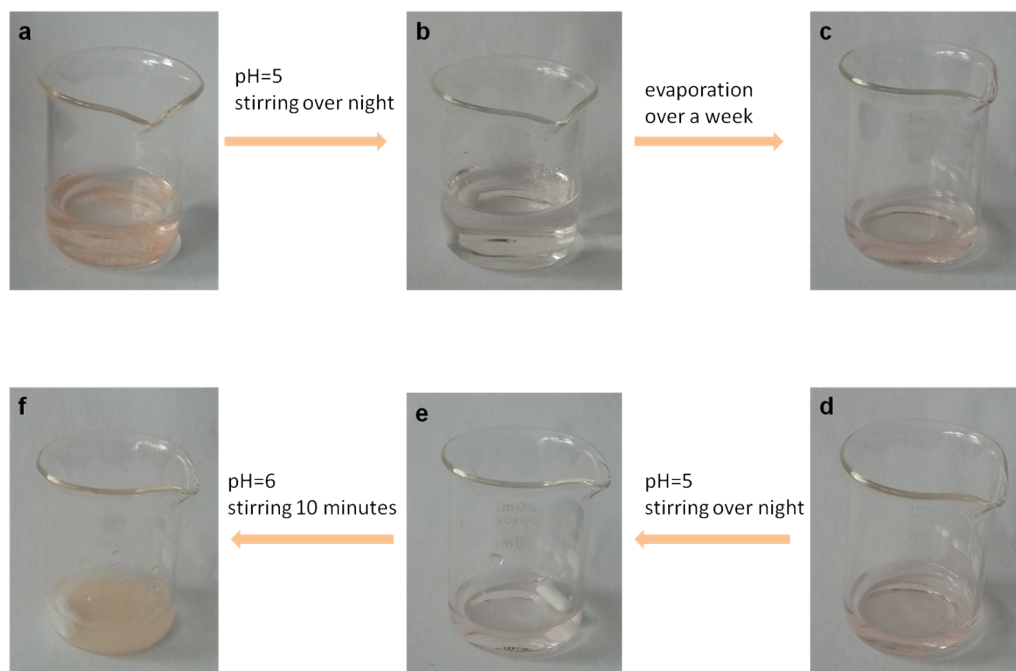

**Figure S21.** Crystal-to-crystal transformation from **4** to **5** (*a* to *c*), and from **5** to **4** (*d* to *f*).

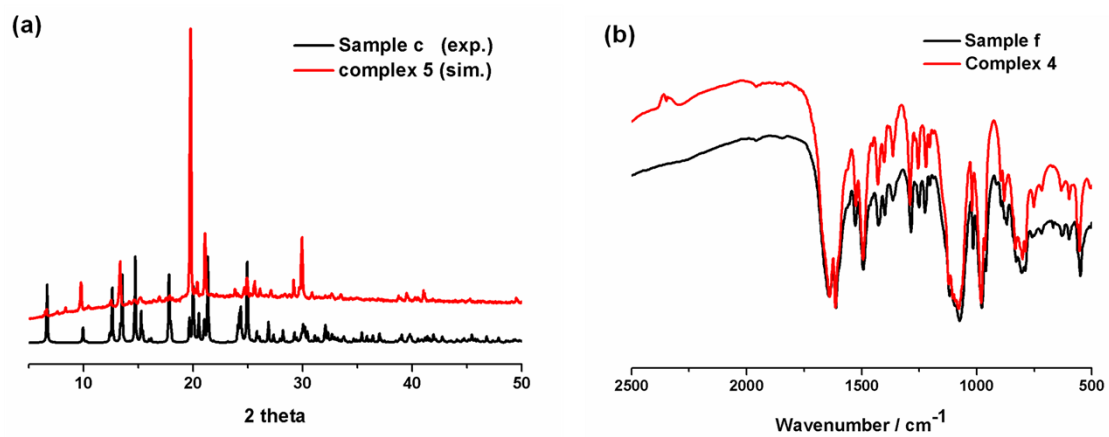

**Figure S22.** (a) Comparison between crystal transition product *c* (crystalline) and complex **5** by the methods of PXRD. (b) Comparison between crystal transition product *f* (powder) and complex **4** by the methods of IR.
